# Supplementary material for: Quantification of hexagonal boron nitride impurities in boron nitride nanotubes via FTIR spectroscopy
Source: PubMed Central journal article supplement (PMC9419701; doi:10.1039/c8na00251g), 2019-03-12
Supplement: NA-001-C8NA00251G-s001.pdf [file NA-001-C8NA00251G-s001.pdf]

1 **Quantification of Hexagonal Boron Nitride impurities in Boron Nitride**  
2 **Nanotubes via FT-IR Spectroscopy**

3 **Supplemental Information**

4 Haley Harrison,<sup>a</sup> Jason T. Lamb,<sup>b</sup> Kyle S. Nowlin,<sup>d</sup> Andrew J. Guenther,<sup>c</sup> Kamran B. Ghiassi,<sup>c</sup> Ajit D.  
5 Kelkar,<sup>d</sup> Jeffrey R. Alston<sup>d\*</sup> SI Figures

6

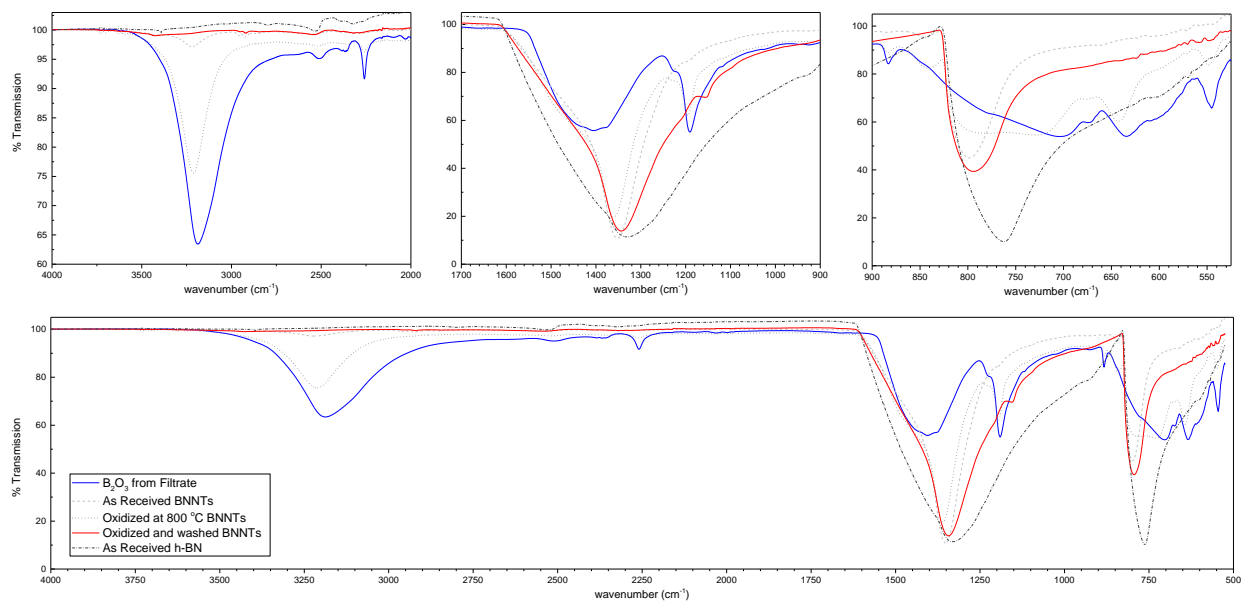

8 Figure SI 1. FT-IR transmission spectra of boron oxide overlaid on as received BNNTs and  
9 h-BN.

10

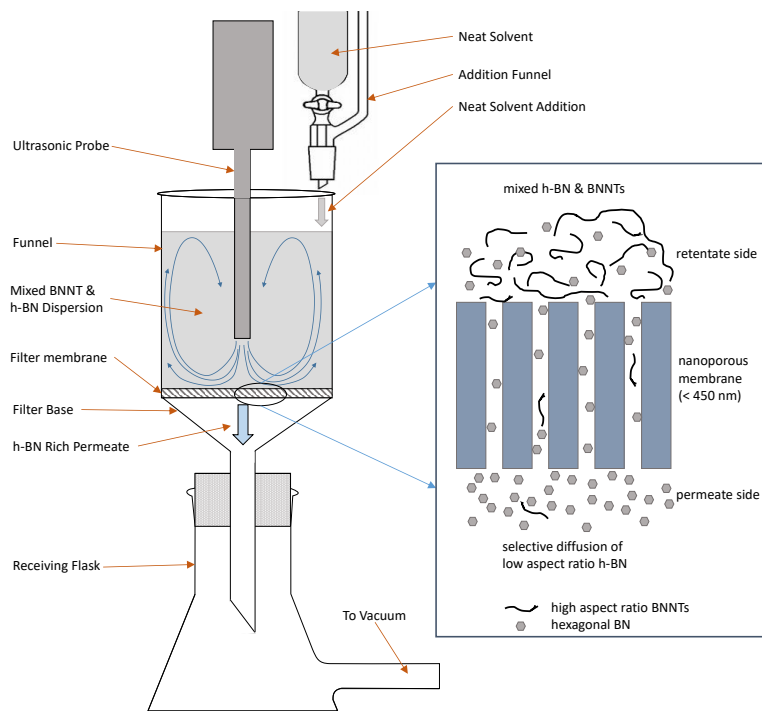

1  
 2 Figure SI 2. Schematic diagram of ultrasonically assisted diffusion separation of BNNTs and  
 3 h-BN.

4  
 5  
 6  
 7

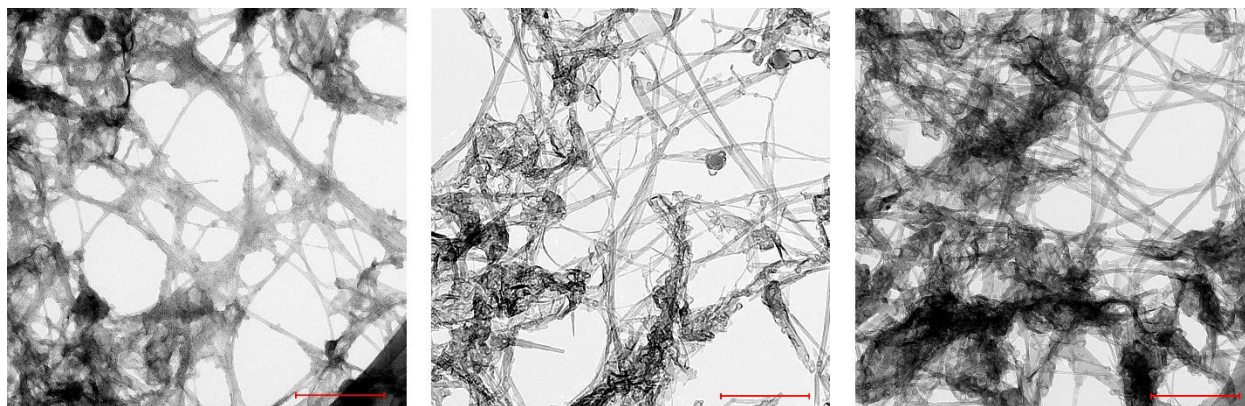

8  
 9 Figure SI 3. TEM micrographs of BNNT samples. From Left to Right, as-received BNNTs  
 10 (AR-BNNTs), oxidized and washed BNNTs (OW-BNNTs), and Triton X-100 separated  
 11 BNNTs (TX-BNNTs). The red scale bar for each image is 200 nm.

1

## 2 Useful Literature Images Provided for Analysis Perspective

3

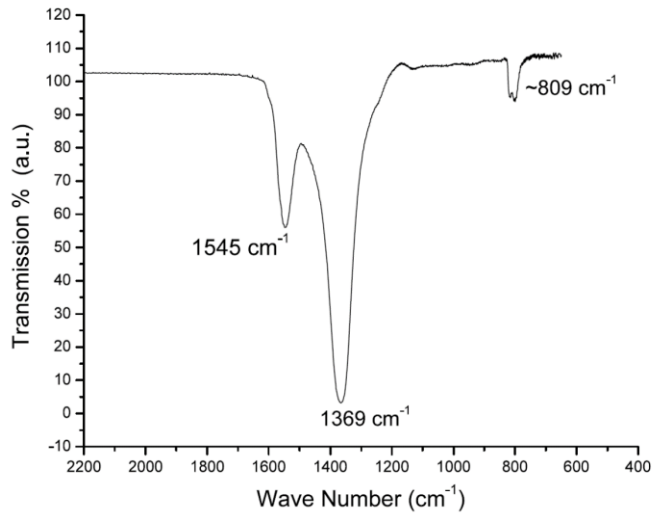

4

5 Figure SI 4. FT-IR transmission spectrum from highly pure boron nitride nanotubes  
6 (BNNTs). Reproduced from Chee Huei et al.<sup>1</sup> Vibrational modes along the tube axis (LO) of  
7 a BNNT correspond to  $\sim 1369\text{ cm}^{-1}$ , while circumferential or tangential vibration modes (T)  
8 tangent to the axis are at  $\sim 1545\text{ cm}^{-1}$ . Out-of-plane radial buckling modes are at  $\sim 809\text{ cm}^{-1}$ .

9

10

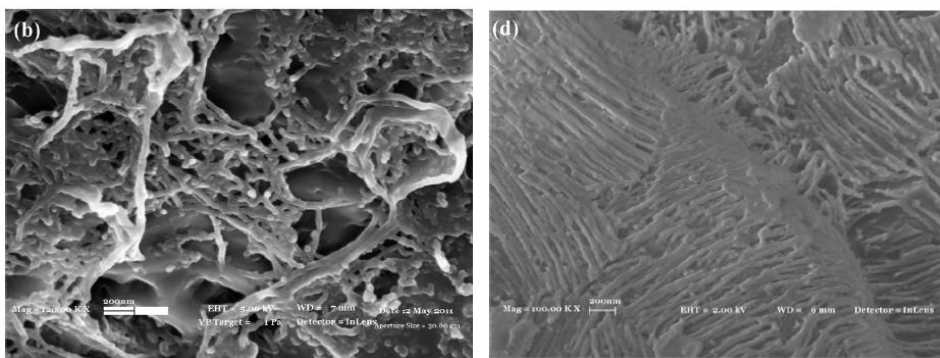

11

12 Figure SI 5. HRSEM image from Okan et al. Figure 9b sample BNNT-3 & Figure 9d sample  
13 BNNT-5. Representative SEM images of the BN structures formed during the synthesis  
14 described in the study.<sup>4</sup>

15

1  
2  
3  
4

#### Boron Oxide and Boric Acid

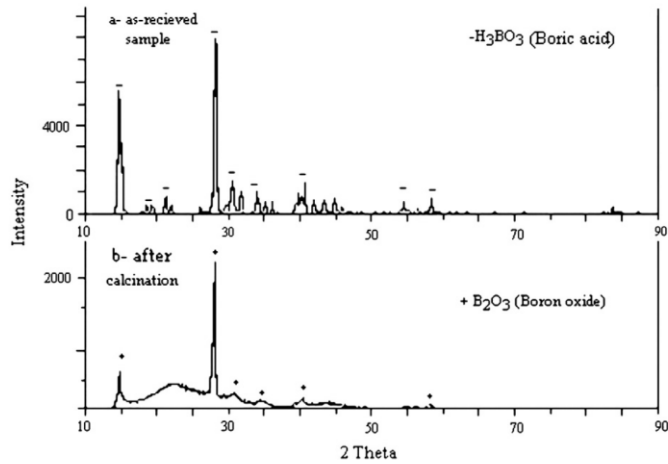

5

6 Figure SI 6. XRD patterns of a) boric acid and b) boron oxide powder after calcination of  
7 boric acid in  $\text{Ar}_{(g)}$  at  $400\text{ }^\circ\text{C}$ .<sup>2</sup> A notable observation is the presence of a  $2\theta$  diffraction near  
8  $27^\circ$ , which has been assigned to boron oxide (b) but overlaps similar peaks for boric acid  
9 (a), and peaks commonly assigned to (002) h-BN in many studies (Figures 6 and 7 of the  
10 main text).

11

12

#### 13 Hexagonal Boron Nitride (h-BN)

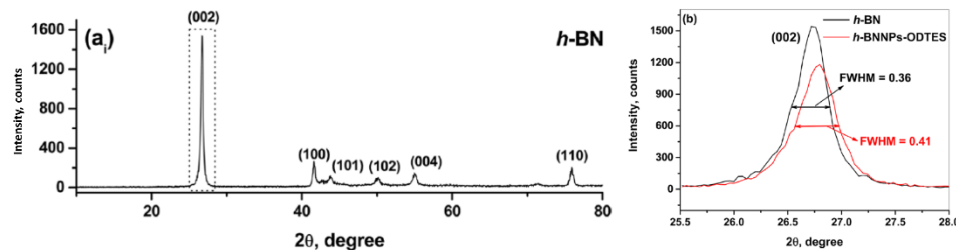

14

15 Figure SI 7. XRD Spectra of pure hexagonal boron nitride (h-BN), reproduced from Figure  
16 3a<sub>i</sub> and 3b in Kumari et al.<sup>5</sup> a<sub>i</sub>) The diffraction peaks corresponding to the (002), (100),  
17 (101), (102), (004), and (110) planes are all clearly shown and is characteristic of highly  
18 ordered h-BN structure. b) The (002) peak is symmetric and narrow at a  $2\theta = 26.75^\circ$  with  
19 a FWHM of  $0.36^\circ$ .

1

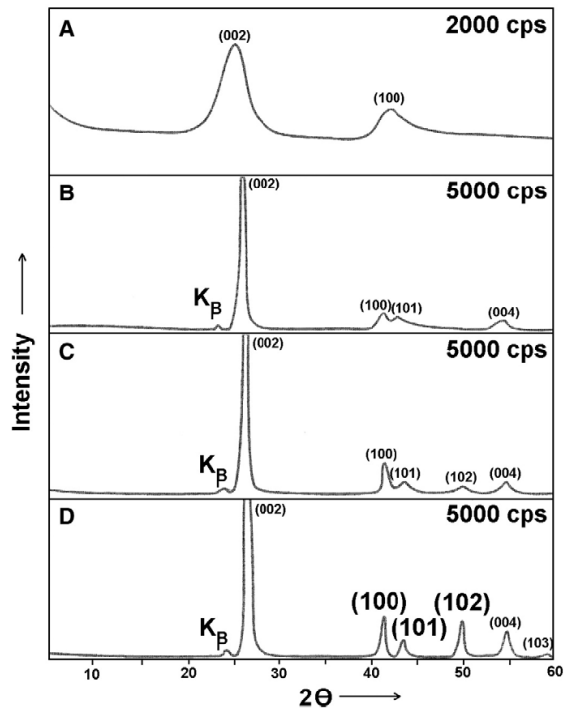

2

3 Figure SI 8. XRD spectra reproduced from Thomas et al.<sup>6</sup> and Figure 1 in Balint et al.<sup>3</sup>  
4 Resolution of the characteristic peaks of h-BN increase in order from A – D; showing the  
5 effects of three-dimensional ordering, from turbostratic boron nitride to complete three-  
6 dimensional order, respectively.

7

8

9

10

11

12

13

14

15

16

1

2 Boron Nitride Nanotube (BNNTs)

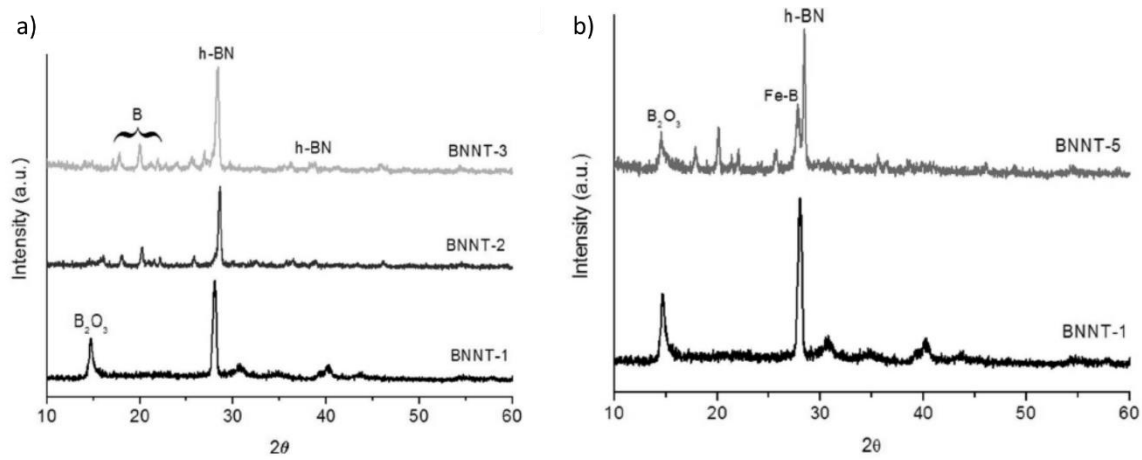

3

4 Figure SI 9. a) XRD patterns of BN nanostructures produced using pure boron powder.  
5 Diffraction peaks of (002) h-BN are observed at  $2\theta = 27.7^\circ$ ,  $28^\circ$ , and  $28.4^\circ$  for BNNT-1,  
6 BNNT-2, and BNNT-3, respectively. A diffraction peak of (100) h-BN is observed at  $2\theta \approx$   
7  $41^\circ$  in BNNT-1.  $B_2O_3$  is observed in BNNT-1 at  $2\theta \approx 14^\circ$ , while unreacted Boron in BNNT-1  
8 and BNNT-2 is observed between  $2\theta = 15^\circ - 25^\circ$ . b) A diffraction peak of Fe-B, a high  
9 temperature ( $750^\circ\text{C}$ ) side product appears at  $2\theta \approx 27^\circ$  for BNNT-5, compared to BNNT-1  
10 produced at a lower temperature ( $600^\circ\text{C}$ ).<sup>4</sup>

11

12

13

14

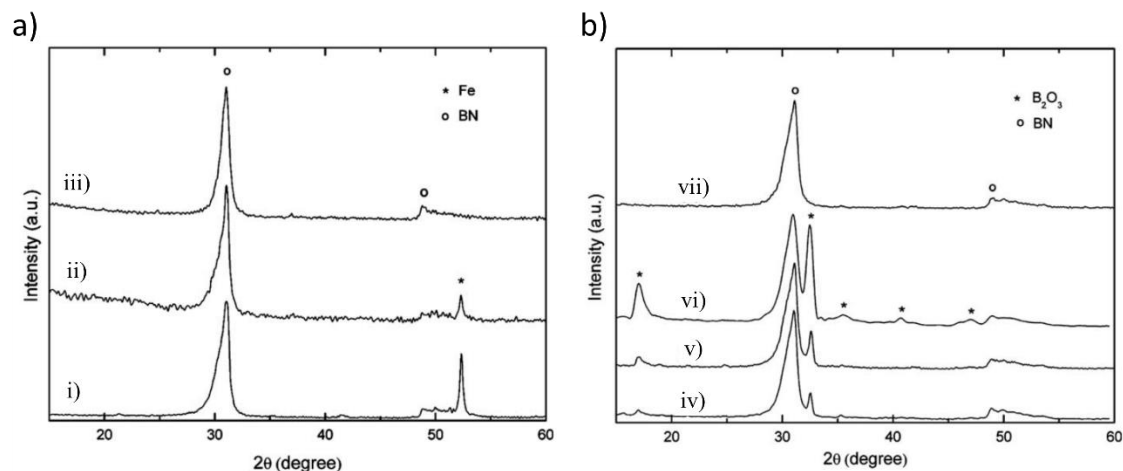

1  
 2 Figure SI 10. XRD patterns of BNNTs i-iii) as-synthesized, dispersed, and acid washed,  
 3 respectively; iv-vi) oxidized at 750 °C, 800 °C, and 850 °C, respectively; vii) sample (v)  
 4 washed with hot water.<sup>7</sup> Typical diffraction peak of (002) h-BN appears around  $2\theta \approx 31^\circ$  in  
 5 all samples, and  $B_2O_3$  is observed at  $2\theta \approx 16^\circ$  for oxidized samples.

6  
 7  
 8

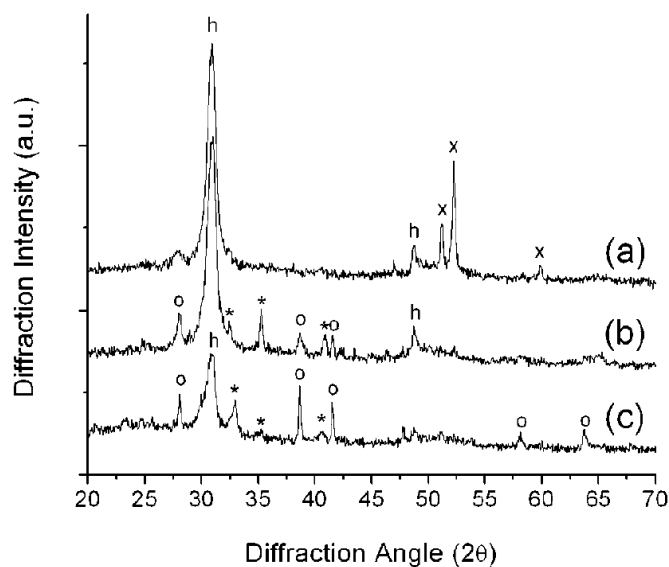

9  
 10 Figure SI 11. XRD spectra of BNNTs a) before oxidation, b) after oxidation at 700 °C (air),  
 11 and c) further oxidized in air up to 900 °C. Peak designations are X: Fe; o:  $Fe_2O_3$  and \*:  $B_2O_3$ ,  
 12 although not including  $2\theta$  angles below  $20^\circ$  in the spectra, to show the  $2\theta \approx 15^\circ$  formation  
 13 of boron oxide is a crucial omission from this data.<sup>8</sup>

2

3 1. Chee Huei L, Jiesheng W, Vijaya KK, Jian YH, Yoke Khin Y. Effective growth of boron  
4 nitride nanotubes by thermal chemical vapor deposition. *Nanotechnology* 2008,  
5 **19**(45): 455605.

6

7 2. Atasoy A. The aluminothermic reduction of boric acid. *International Journal of*  
8 *Refractory Metals and Hard Materials* 2010, **28**(5): 616-622.

9

10 3. Balint MG, Petrescu MI. An attempt to identify the presence of polytype stacking  
11 faults in hBN powders by means of X-ray diffraction. *Diamond and Related Materials*  
12 2009, **18**(9): 1157-1162.

13

14 4. Saner Okan B, Kocabaş ZÖ, Nalbant Ergün A, Baysal M, Letofsky-Papst I, Yürüm Y.  
15 Effect of Reaction Temperature and Catalyst Type on the Formation of Boron Nitride  
16 Nanotubes by Chemical Vapor Deposition and Measurement of Their Hydrogen  
17 Storage Capacity. *Industrial & Engineering Chemistry Research* 2012, **51**(35):  
18 11341-11347.

19

20 5. Kumari S, Sharma OP, Gusain R, Mungse HP, Kukrety A, Kumar N, *et al.* Alkyl-Chain-  
21 Grafted Hexagonal Boron Nitride Nanoplatelets as Oil-Dispersible Additives for  
22 Friction and Wear Reduction. *ACS Applied Materials & Interfaces* 2015, **7**(6): 3708-  
23 3716.

24

25 6. Thomas J, Weston NE, O'Connor TE. Turbostratic<sup>1</sup> Boron Nitride, Thermal  
26 Transformation to Ordered-layer-lattice Boron Nitride. *Journal of the American*  
27 *Chemical Society* 1962, **84**(24): 4619-4622.

28

29 7. Chen H, Chen Y, Yu J, Williams JS. Purification of boron nitride nanotubes. *Chemical*  
30 *Physics Letters* 2006, **425**(4-6): 315-319.

31

32 8. Chen Y, Zou J, Campbell SJ, Caer GL. Boron nitride nanotubes: Pronounced resistance  
33 to oxidation. *Applied Physics Letters* 2004, **84**(13): 2430-2432.

34

35
